# Supplementary material
Source: Springer Nature journal article supplement (https://www.springermedizin.de/resource/supplementary/12913_2006_493_MOESM7_ESM.pdf/9534868)

Safe water HAART Nevirapine

No evidence Need Clinical outcomes Cost-effectiveness Equity Final rank

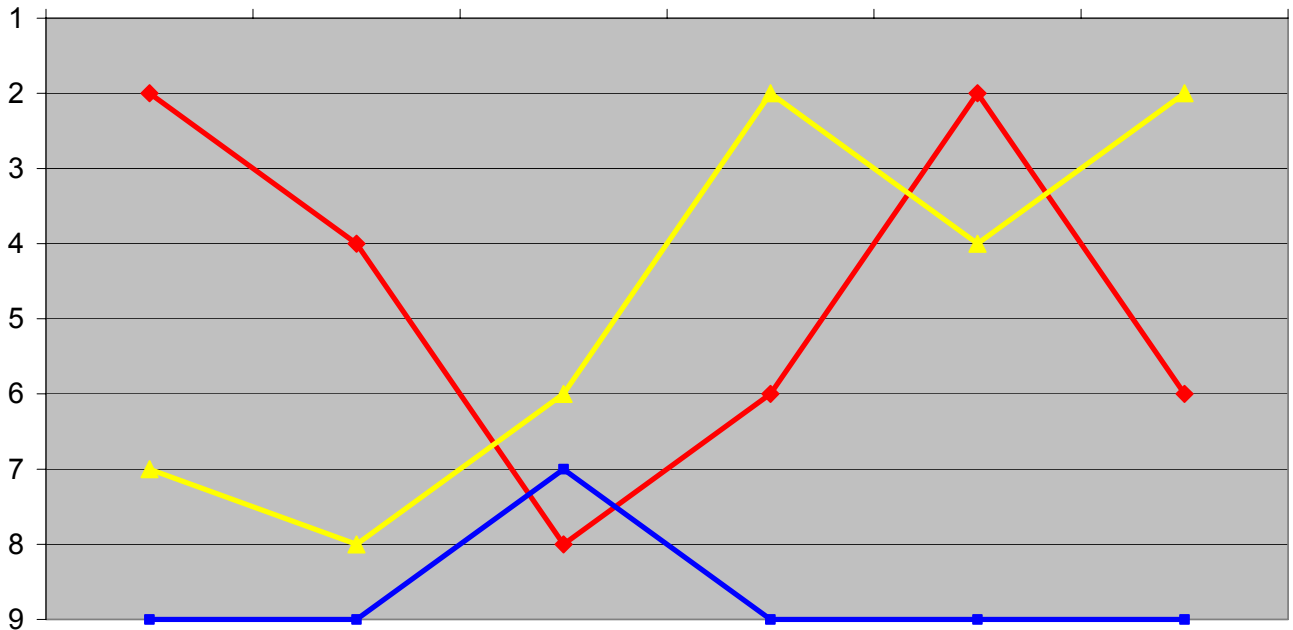

Supplement: MOESM7 [file 9534868]
